# Supplementary material for: Safety and efficacy of Hypofractionated stereotactic radiosurgery for high-grade Gliomas at first recurrence: a single-center experience
Source: PubMed Central journal article supplement (PMC7863415; doi:10.1186/s12885-021-07856-y), 2021-02-05
Supplement: 12885_2021_7856_MOESM1_ESM.pdf [file 12885_2021_7856_MOESM1_ESM.pdf]

## **Title Page**

**Title:** Safety and Efficacy of Hypofractionated Stereotactic Radiosurgery for High-grade Gliomas at First Recurrence: A Single-Center Experience

**Running Title:** CyberKnife for Recurrent High-grade Gliomas

**Authors:** Yun Guan<sup>1234\*</sup> MD, Ji Xiong<sup>5</sup> MD, Mingyuan Pan<sup>1234\*</sup> M.S., Wenyin Shi<sup>6</sup> PhD, Jing Li<sup>1234</sup> MD, Huaguang Zhu<sup>1234</sup> MD, Xiu Gong<sup>1234</sup> MD, Chao Li<sup>1234</sup> MD, Guanghai Mei<sup>1234</sup> MD, Xiaoxia Liu<sup>1234</sup> MD, Li Pan<sup>1234</sup> MD, Jiazhong Dai<sup>1234</sup> MD, Yang Wang<sup>1234</sup> MD, Enmin Wang<sup>1234&</sup> MD, Xin Wang<sup>1234&</sup> MD

1 CyberKnife Center, Department of Neurosurgery, Huashan Hospital, Fudan University, 12 Wulumuqi Road (M), Shanghai, 200040, China.

2 Neurosurgical Institute of Fudan University, 12 Wulumuqi Road (M), Shanghai, 200040, China.

3 Shanghai Clinical Medical Center of Neurosurgery, 12 Wulumuqi Road (M), Shanghai, 200040, China.

4 Shanghai Key Laboratory of Brain Function and Restoration and Neural Regeneration, 12 Wulumuqi Road (M), Shanghai, 200040, China.

5 Department of pathology, Huashan Hospital, Fudan University, 12 Wulumuqi Road (M), Shanghai, 200040, China.

6 Department of Radiation Oncology, Thomas Jefferson University, Philadelphia, PA,  
USA.

&Corresponding author:

Xin Wang, MD

E-mail: wangxinck@fudan.edu.cn

Tel: +86-13120557273

Address: CyberKnife Center, Department of Neurosurgery, Huashan Hospital, Fudan  
University, 12 Wulumuqi Road (M), Shanghai, 200040, China.

Enmin Wang, MD

E-mail: emwang@fudan.edu.cn

Tel: +86-13671727320

Address: CyberKnife Center, Department of Neurosurgery, Huashan Hospital, Fudan  
University, 12 Wulumuqi Road (M), Shanghai, 200040, China.

Additional file 1. Treatment of progression after CyberKnife radiosurgery

| Treatment        | No. of Patients | Percentage % |
|------------------|-----------------|--------------|
| Surgery          | 2               | 3            |
| Radiotherapy     |                 |              |
| IMRT*            | 1               | 1            |
| CyberKnife       | 13              | 19           |
| TTF†             | 2               | 3            |
| Systemic therapy |                 |              |
| Anti-PD-1        | 3*              | 4            |
| Anlotinib        | 2               | 3            |
| Bevacizumab      | 1               | 1            |
| Temozolomide     | 1               | 1            |
| BSC‡             | 46              | 65           |

Abbreviations: IMRT = Intensity-modulated radiation therapy ; TTF = Tumor Treatment Field; BSC = Best Supportive Care.

\* One patient had CyberKnife with anti-PD-1 treatment.

Additional file 2. The dilemma of diagnosis of the LR and RN

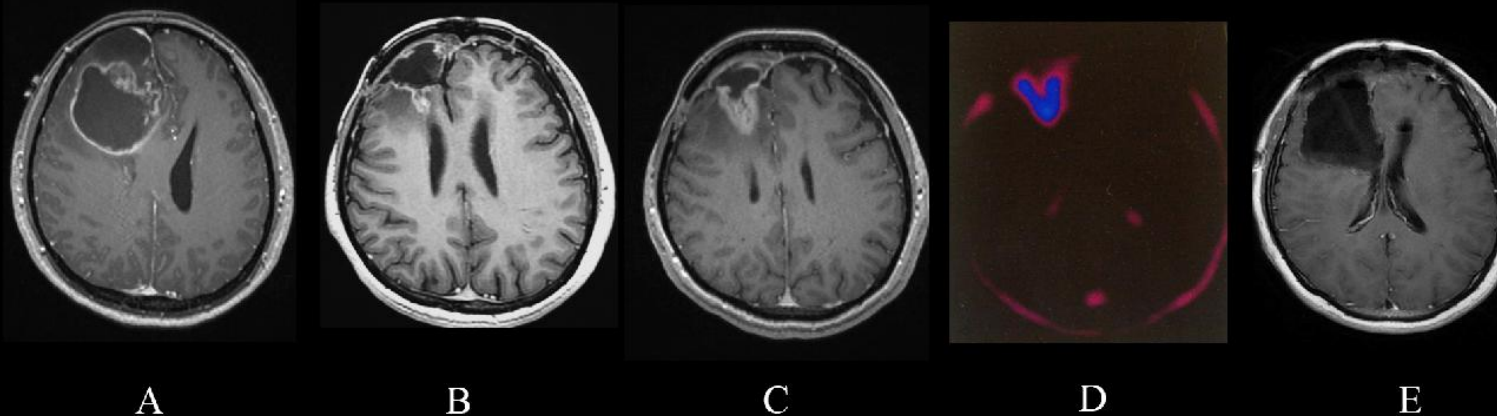

Case 1.

- A. Forty-year-old female, presented with headache and dizziness. Histological-proven glioblastoma, MGMT (-), IDH1(+), 1p19q (-).
- B. RANO criteria diagnosed recurrence. Seventeen months after surgery and adjuvant chemoradiation IMRT 56Gy/28fx and temozolomide.
- C, D. Recurrence diagnosed by RANO criteria and 11C-methionine PET. Six months after CyberKnife 20Gy/5fx with concurrent bevacizumab.
- E. Histological-proven radiation necrosis after gross total resection.

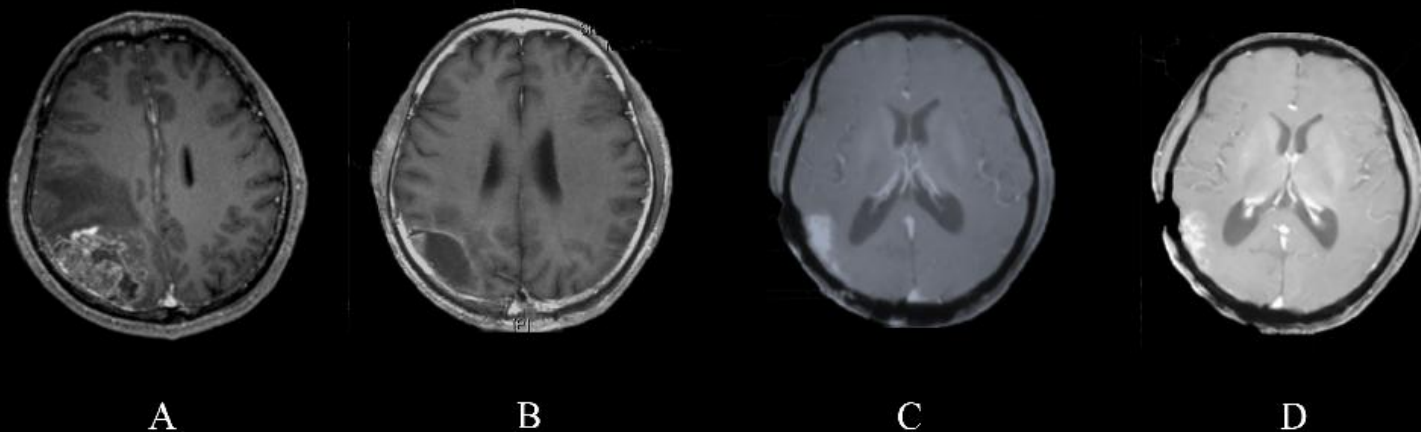

Case 2.

- A. Fifty-eight years old male. Histological-proven glioblastoma, MGMT (-), IDH1(-), 1p19q (-), TERT (+).
- B. Treated with surgery and adjuvant chemoradiation IMRT 60Gy/30fx plus temozolomide and TTF. Four months after initial diagnosis.
- C. Twelve months after surgery, RANO criteria diagnosed recurrence.
- D. Three months follow-up after CyberKnife 25Gy/5fx with concurrent bevacizumab.
